# Supplementary material
Source: bioRxiv or medRxiv preprint supplement (https://medrxiv.org/highwire/filestream/81997/field_highwire_adjunct_files/3/2020.05.13.20101022-4.pdf)
Supplement: Supplementary file [file 2020.05.13.20101022-4.pdf]

**Appendix 4** shows the ratio of negative COVID-19 tests to 1 positive COVID-19 test, and the number of COVID-19 tests per 1,000,000 in the population for each of the 7 countries included in our analysis, as of May 10, 2020.(1–8)

|                    | <b>Total Tests to Positive Tests Ratio</b> | <b>Tests per 1M</b> |
|--------------------|--------------------------------------------|---------------------|
| <b>Australia</b>   | 119.27                                     | 32,466              |
| <b>Austria</b>     | 19.94                                      | 35,143              |
| <b>Iceland</b>     | 30.09                                      | 158,816             |
| <b>Israel</b>      | 27.63                                      | 52,598              |
| <b>Germany</b>     | 16.04                                      | 32,891              |
| <b>New Zealand</b> | 127.39                                     | 39,468              |
| <b>South Korea</b> | 61.05                                      | 12,949              |

## References

1. Worldometer. COVID-19 Coronavirus Pandemic. Dover; 2020.
2. Australian Government Department of Health. Coronavirus (COVID-19) health alert April 21, 2020. Canberra; 2020.
3. Federal Ministry for Social Affairs Health Nursing and Consumer Protection. Austria: Official COVID19 dashboard public information. Vienna; 2020.
4. Directorate of Health. COVID-19 in Iceland – Statistics. Reykjavik; 2020.
5. Ministry of Health. COVID-19 Update [Internet]. Government of Israel. Jerusalem; 2020. Available from: <https://govextra.gov.il/ministry-of-health/corona/corona-virus/>
6. Robert Koch Institute. COVID-19 in Germany. Berlin; 2020.
7. Ministry of Health. COVID-19 - current cases. New Zealand Government. 2020.
8. Central Disease Control Headquarters. Coronavirus Disease-19, Republic of Korea. Sejong; 2020.
